# Supplementary material for: A high-density energetic ammonium salt via a polynitropyrazolate counteranion
Source: Royal Society of Chemistry journal article supplement (doi:10.1039/d5dt00237k), 2025-01-01
Supplement: d5dt00237k1.pdf [file d5dt00237k1.pdf]

## Supporting Information

### A High-density Energetic Ammonium Salt via a Polynitropyrazolate Counteranion

Miao Li,<sup>a</sup> Yubei Zhang,<sup>a</sup> Yaqun Dong,<sup>b</sup> Jing Liu,<sup>a</sup> Yuji Liu,<sup>a</sup> Wei Huang,<sup>a</sup> Chuan  
Xiao,<sup>\*c</sup> Guangbin Cheng,<sup>a</sup> Yongxing Tang<sup>\*a</sup>

<sup>a</sup>School of Chemistry and Chemical Engineering, Nanjing University of Science and  
Technology, Nanjing 210094 (China).

<sup>b</sup>Luzhou Northern Chemical Industry Co., Ltd, Sichuan 646000, China.

<sup>c</sup>China Northern Industries Group Co., Ltd (NORINCO GROUP), Beijing 100089,  
China.

## Table of Contents

|                                                                                 |     |
|---------------------------------------------------------------------------------|-----|
| 1. General methods .....                                                        | S3  |
| 2. Computational methods .....                                                  | S4  |
| 3. Interaction of different energetic ammonium salts with water molecules ..... | S6  |
| 4. Experimental section.....                                                    | S8  |
| 5. Crystal structure data .....                                                 | S12 |
| 6. NMR spectra .....                                                            | S19 |
| 7. DSC plots.....                                                               | S22 |

## 1. General methods

$^1\text{H}$  and  $^{13}\text{C}$  NMR spectra were recorded on a Bruker AVANCE III 300 MHz nuclear magnetic resonance spectrometer.  $\text{DMSO-}d_6$  was used as solvent and locking solvent. The working frequencies for  $^1\text{H}$  and  $^{13}\text{C}$  are 300 MHz and 75 MHz, respectively. Chemical shifts were reported relative to tetramethylsilane as internal standard. Decomposition temperatures (onset) were obtained on a TA Instruments DSC25 differential scanning calorimeter at a heating rate of  $5\text{ }^\circ\text{C min}^{-1}$ . Infrared spectra (IR) were recorded on a PerkinElmer Spectrum BX FT-IR instrument equipped with an ATR unit at  $25\text{ }^\circ\text{C}$ . Elemental analyses of C/H/N were performed on a Vario EL III Analyzer. Impact and friction sensitivities were measured with a BAM fallhammer and friction tester. The densities were measured by AccuPyc II 1345 gas pycnometer (Micromeritics). X-ray intensity data were collected on a Bruker D8 VENTURE PHOTON II system equipped with an Incoatecius 3.0 Microfocus sealed tube. The structures were solved and refined using Bruker SHELXTL Software Package. The data were refined against  $F^2$ . All non-hydrogen atoms were refined anisotropically. Hydrogen atoms were fixed to their parent atoms using a riding model and refined isotropically.

## 2. Computational methods

The gas-phase heats of formation were calculated by using the isodesmic reactions (Scheme S1). The enthalpy of reaction was obtained by combining the MP2/6-311++G\*\* energy difference for reactions, the scaled zero-point energies (ZPE), values of thermal correction (HT), and other thermal factors. The solid-state heats of formation for **2** anion was estimated by subtracting gas-phase enthalpies with the corresponding enthalpy of sublimation ( $\Delta H_{\text{sub}}$ ). In equation 1,  $T$  represents either the melting point or decomposition temperature when no melting occurs prior to decomposition.

$$\Delta H_{\text{sub}} = 188/J \text{ mol}^{-1} \text{ K}^{-1} \times T \quad (1)$$

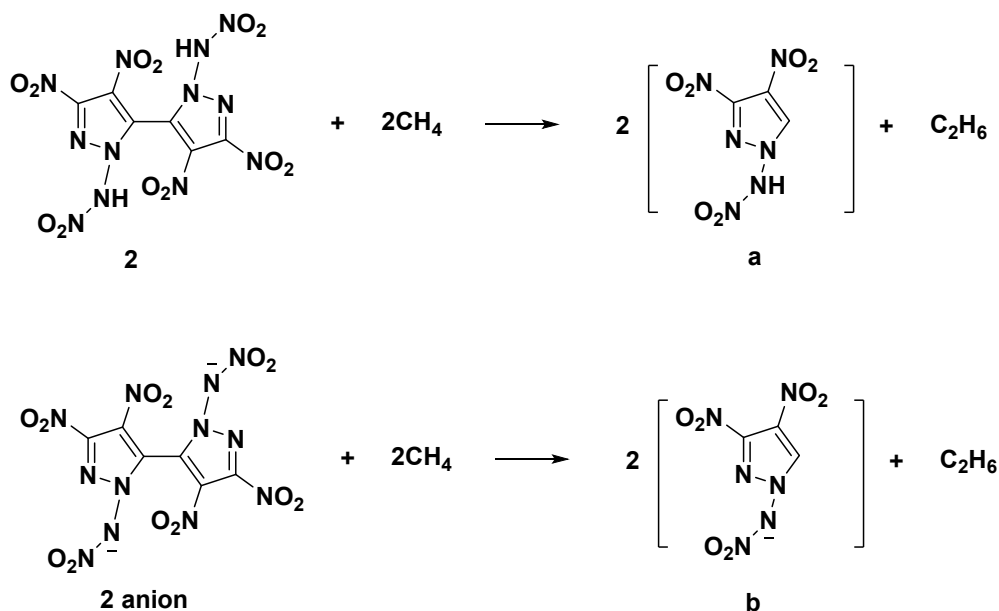

**Scheme S1.** Isodesmic reactions for **2** and **2** anion.

**Table S1.** Calculated zero-point energy (ZPE), values of the correction (H<sub>r</sub>), total energy (E<sub>0</sub>) and heats of formation (HOF)

| Species                       | ZPE      | H <sub>r</sub> | E <sub>0</sub> | Corrected E <sub>0</sub> | HOF<br>(kJ mol <sup>-1</sup> ) |
|-------------------------------|----------|----------------|----------------|--------------------------|--------------------------------|
| <b>2</b>                      | 0.168456 | 0.195175       | -1785.000564   | -1784.81213              | 884.8400573                    |
| <b>a</b>                      | 0.094081 | 0.10754        | -893.073118    | -892.96934               | 350.6617043                    |
| <b>b</b>                      | 0.081064 | 0.094034       | -892.583409    | -892.49262               | 70.91969078                    |
| <b>2 anion</b>                | 0.142009 | 0.167877       | -1783.945157   | -1783.78296              | 183.4976094                    |
| CH <sub>4</sub>               | 0.044793 | 0.048605       | -40.3796224    | -40.33281                | -74.6                          |
| C <sub>2</sub> H <sub>6</sub> | 0.074599 | 0.079027       | -79.5716306    | -79.49559                | -84                            |

[a] Data obtained from G2.

**Table S2.** Calculated solid state heat of formation (HOF)

| Compound  | $\Delta H_L$ (kJ/mol) | $\Delta H_f^{\text{Cation}}$ (kJ/mol) | $\Delta H_f^{\text{Anion}}$ (kJ/mol) | $\Delta H_f^{298}$ (KJ/mol) |
|-----------|-----------------------|---------------------------------------|--------------------------------------|-----------------------------|
| <b>2</b>  | /                     | /                                     | /                                    | 814.2                       |
| <b>2a</b> | 1162.216623           | 626.4                                 | 183.5                                | 274.1                       |
| <b>2b</b> | 1062.109639           | 671.1                                 | 183.5                                | 463.6                       |

**Table S3.** Cartesian coordinates (in Å) of the DFT-optimized structure of **2**.

| Number | Symbol | Coordinates (Å) |          |         |
|--------|--------|-----------------|----------|---------|
|        |        | X               | Y        | Z       |
| 1      | C      | 4.089           | 24.517   | 9.017   |
| 2      | C      | 6.021           | 25.038   | 9.908   |
| 3      | C      | 4.685           | 24.801   | 10.227  |
| 4      | C      | 2.724           | 24.139   | 8.648   |
| 5      | C      | 2.007           | 22.98    | 8.83    |
| 6      | C      | 0.825           | 23.165   | 8.119   |
| 7      | N      | 5.077           | 24.586   | 8.096   |
| 8      | N      | 6.265           | 24.916   | 8.622   |
| 9      | N      | 0.775           | 24.36    | 7.548   |
| 10     | N      | 1.932           | 24.924   | 7.877   |
| 11     | N      | 5.001           | 24.439   | 6.706   |
| 12     | N      | 4.82            | 23.145   | 6.412   |
| 13     | N      | 7.127           | 25.475   | 10.763  |
| 14     | N      | 4.037           | 24.709   | 11.507  |
| 15     | N      | 2.512           | 21.812   | 9.49    |
| 16     | N      | -0.287          | 22.285   | 7.906   |
| 17     | N      | 2.25            | 26.144   | 7.294   |
| 18     | N      | 2.154           | 27.102   | 8.195   |
| 19     | O      | 4.879           | 22.881   | 5.194   |
| 20     | O      | 8.248           | 25.153   | 10.446  |
| 21     | O      | 4.735           | 24.465   | 12.488  |
| 22     | O      | 2.189           | 20.722   | 9.044   |
| 23     | O      | -0.454          | 21.371   | 8.693   |
| 24     | O      | 1.907           | 26.91    | 9.375   |
| 25     | O      | 4.597           | 22.264   | 7.264   |
| 26     | O      | 6.838           | 26.174   | 11.725  |
| 27     | O      | 2.82            | 24.85    | 11.54   |
| 28     | O      | 3.249           | 21.991   | 10.463  |
| 29     | O      | -0.997          | 22.495   | 6.926   |
| 30     | O      | 2.355           | 28.264   | 7.738   |
| 31     | H      | 2.51157         | 26.27559 | 6.33783 |
| 32     | H      | 5.07068         | 25.18117 | 6.03943 |

**Table S4.** Cartesian coordinates (in Å) of the DFT-optimized structure of **2a**.

| Number | Symbol | Coordinates (Å) |        |        |
|--------|--------|-----------------|--------|--------|
|        |        | X               | Y      | Z      |
| 1      | C      | 4.089           | 24.517 | 9.017  |
| 2      | C      | 6.021           | 25.038 | 9.908  |
| 3      | C      | 4.685           | 24.801 | 10.227 |
| 4      | C      | 2.724           | 24.139 | 8.648  |
| 5      | C      | 2.007           | 22.98  | 8.83   |
| 6      | C      | 0.825           | 23.165 | 8.119  |
| 7      | N      | 5.077           | 24.586 | 8.096  |
| 8      | N      | 6.265           | 24.916 | 8.622  |
| 9      | N      | 0.775           | 24.36  | 7.548  |
| 10     | N      | 1.932           | 24.924 | 7.877  |
| 11     | N      | 5.001           | 24.439 | 6.706  |
| 12     | N      | 4.82            | 23.145 | 6.412  |
| 13     | N      | 7.127           | 25.475 | 10.763 |
| 14     | N      | 4.037           | 24.709 | 11.507 |
| 15     | N      | 2.512           | 21.812 | 9.49   |
| 16     | N      | -0.287          | 22.285 | 7.906  |
| 17     | N      | 2.25            | 26.144 | 7.294  |
| 18     | N      | 2.154           | 27.102 | 8.195  |
| 19     | O      | 4.879           | 22.881 | 5.194  |
| 20     | O      | 8.248           | 25.153 | 10.446 |
| 21     | O      | 4.735           | 24.465 | 12.488 |
| 22     | O      | 2.189           | 20.722 | 9.044  |
| 23     | O      | -0.454          | 21.371 | 8.693  |
| 24     | O      | 1.907           | 26.91  | 9.375  |
| 25     | O      | 4.597           | 22.264 | 7.264  |
| 26     | O      | 6.838           | 26.174 | 11.725 |
| 27     | O      | 2.82            | 24.85  | 11.54  |
| 28     | O      | 3.249           | 21.991 | 10.463 |
| 29     | O      | -0.997          | 22.495 | 6.926  |
| 30     | O      | 2.355           | 28.264 | 7.738  |
| 31     | N      | 1.189           | 27.391 | 12.024 |
| 32     | H      | 1.666           | 26.895 | 11.524 |
| 33     | H      | 1.039           | 26.988 | 12.76  |
| 34     | H      | 1.604           | 28.118 | 12.184 |
| 35     | H      | 0.449           | 27.562 | 11.638 |
| 36     | N      | 3.387           | 27.524 | 5.286  |
| 37     | H      | 4.123           | 27.202 | 5.569  |
| 38     | H      | 2.971           | 27.896 | 5.927  |
| 39     | H      | 3.543           | 28.097 | 4.677  |
| 40     | H      | 2.909           | 26.893 | 4.964  |

**Table S5.** Cartesian coordinates (in Å) of the DFT-optimized structure of **2b**.

| Number | Symbol | Coordinates (Å) |          |          |
|--------|--------|-----------------|----------|----------|
|        |        | X               | Y        | Z        |
| 1      | C      | 1.10201         | 3.4749   | 4.3539   |
| 2      | C      | 3.09481         | 4.0123   | 5.27294  |
| 3      | C      | 1.78974         | 4.18954  | 5.44982  |
| 4      | C      | -0.20875        | 3.26238  | 4.19803  |
| 5      | C      | -1.00163        | 3.07883  | 2.96418  |
| 6      | C      | -2.27654        | 3.26833  | 3.2876   |
| 7      | N      | 2.21272         | 3.05013  | 3.46896  |
| 8      | N      | 3.42473         | 3.20696  | 4.21204  |
| 9      | N      | -2.49954        | 3.51003  | 4.61981  |
| 10     | N      | -1.20572        | 3.75434  | 5.17846  |
| 11     | N      | 2.10117         | 2.59952  | 2.19915  |
| 12     | N      | 3.23153         | 2.23783  | 1.49301  |
| 13     | N      | 3.96458         | 4.54415  | 6.02354  |
| 14     | N      | 1.23922         | 4.84667  | 6.38142  |
| 15     | N      | -0.55107        | 2.79466  | 1.81571  |
| 16     | N      | -3.21108        | 3.229    | 2.43446  |
| 17     | N      | -0.94187        | 4.32605  | 6.37488  |
| 18     | N      | -1.97992        | 4.73782  | 7.18733  |
| 19     | O      | 3.12296         | 1.79923  | 0.25702  |
| 20     | O      | 5.24418         | 4.333    | 5.8002   |
| 21     | O      | 0.99428         | 6.13023  | 6.22547  |
| 22     | O      | -0.211          | 3.75748  | 0.98555  |
| 23     | O      | -4.45624        | 3.42432  | 2.81298  |
| 24     | O      | -1.72309        | 5.2943   | 8.3519   |
| 25     | O      | 4.41726         | 2.33177  | 2.05611  |
| 26     | O      | 3.58909         | 5.30815  | 7.02712  |
| 27     | O      | 0.91191         | 4.24617  | 7.50575  |
| 28     | O      | -0.42279        | 1.53643  | 1.45204  |
| 29     | O      | -2.93736        | 2.9928   | 1.16909  |
| 30     | O      | -3.22593        | 4.57371  | 6.79697  |
| 31     | N      | 0.12608         | -1.07359 | -1.23186 |
| 32     | C      | -0.2972         | -1.82538 | -2.15836 |
| 33     | N      | 0.53712         | -2.56252 | -2.82957 |
| 34     | N      | -1.53299        | -1.8593  | -2.43119 |
| 35     | N      | 0.08508         | -3.36537 | -3.81901 |
| 36     | H      | -0.54779        | -0.47821 | -0.68972 |
| 37     | H      | 1.15102         | -1.04545 | -1.00557 |
| 38     | H      | 1.55718         | -2.53451 | -2.60436 |
| 39     | H      | -1.88405        | -2.48282 | -3.19962 |
| 40     | H      | -2.20686        | -1.26392 | -1.88906 |
| 41     | H      | 0.73971         | -3.94375 | -4.34566 |

---

|    |   |          |          |          |
|----|---|----------|----------|----------|
| 42 | H | -0.91057 | -3.39271 | -4.03883 |
| 43 | N | 1.87592  | 7.72731  | 14.47222 |
| 44 | C | 1.45264  | 6.97552  | 13.54572 |
| 45 | N | 2.28696  | 6.23838  | 12.87451 |
| 46 | N | 0.21685  | 6.94159  | 13.27289 |
| 47 | N | 1.83492  | 5.43552  | 11.88507 |
| 48 | H | 1.20205  | 8.32269  | 15.01436 |
| 49 | H | 2.90086  | 7.75544  | 14.69851 |
| 50 | H | 3.30702  | 6.26638  | 13.09972 |
| 51 | H | -0.13421 | 6.31807  | 12.50446 |
| 52 | H | -0.45702 | 7.53697  | 13.81502 |
| 53 | H | 2.48955  | 4.85715  | 11.35842 |
| 54 | H | 0.83927  | 5.40819  | 11.66525 |

---



### 3. Interaction of different energetic ammonium salts with water molecules

The task was set to DMol3-Geometry Optimization to optimize the molecular conformation. The functional used was GGA-BLYP, with a basis set of DNP-3.5 and All electron core treatment. The convergence criteria were set as follows: energy convergence at  $2.0 \times 10^{-5}$  Ha, force convergence at 0.004 Ha/Å, Max Iteration at 500, and Maximum Step Size at 0.3 Å. It is crucial to ensure that the final results converge. After the optimization is complete, the interaction energy calculation was performed by setting the task to DMol3-Energy using the GGA-BLYP functional. The ammonium salt and water molecules were designated as Set1 and Set2, respectively, with the BSSE correction enabled. After the calculation is complete, the interaction energy can be obtained by reviewing the results. The non-bonding interaction distances can be measured by selecting the Distance option in the Measure-Change toolbar.

#### Interaction energy calculation:

The interaction energy ( $E_{\text{int}}$ ), indicating the intensity of interaction between the components in the system, is derived according to the following equation:

$$E_{\text{int}} = E_{\text{total}} - \sum E_{\text{component}} + E_{\text{bsse}} \quad (2)$$

where  $E_{\text{total}}$  and  $E_{\text{component}}$  represent the total energy of the system, and the energy of each component in the system, respectively.  $E_{\text{bsse}}$  represents BSSE correction energy. More negative  $E_{\text{int}}$  indicates a stronger interaction in the system.

**Table S6.** The interaction energy between **2a**, ammonium dinitramide (ADN) and water molecule

| Compound                     | $E_{\text{total}}$<br>(kcal/mol) | $E_{\text{H}_2\text{O}}$<br>(kcal/mol) | $E_{\text{component}}$<br>(kcal/mol) | $E_{\text{BSSE}}$<br>(kcal/mol) | $E_{\text{int}}$<br>(kcal/mol) |
|------------------------------|----------------------------------|----------------------------------------|--------------------------------------|---------------------------------|--------------------------------|
| <b>2a</b> •H <sub>2</sub> O  | -1241729.23                      | -47974.00                              | -1120105.70                          | 0.34073793                      | -4.71                          |
| <b>ADN</b> •H <sub>2</sub> O | -375709.21                       | -47973.81                              | -327715.24                           | 0.55095378                      | -19.62                         |

## 4. Experimental section

**Caution!** All new compounds in this work are potentially energetic materials that could explode under certain conditions, such as impact, friction and high temperature. Although there were no explosions during this work, appropriate safety precautions must be taken (safety glasses, face shields, earplugs, and gloves).

### Synthesis of 2,2'-dinitroamino-4,4',5,5'-tetranitro-2*H*,2'*H*-3,3'-bipyrazole (**2**)

To a mixture of sulfuric acid (98%, 2.0 mL) and nitric acid (100%, 1.0 mL) was added compound **1** (0.34 g, 1.0 mmol) at -15 °C. The reaction mixture was stirred for 4 hours at this temperature. Then the white precipitate was collected and dried by air.

**2**: White solid (0.36 g, yield: 83 %).  $T_d$  (onset): 103 °C.  $^1\text{H}$  NMR (300 MHz,  $\text{CD}_3\text{CN}$ ):  $\delta = 7.54$  (s, 2H) ppm;  $^{13}\text{C}$  NMR (76 MHz,  $\text{CD}_3\text{CN}$ )  $\delta = 148.4, 129.1, 126.2$  ppm; Elemental analysis for  $\text{C}_6\text{H}_2\text{N}_{12}\text{O}_{12}$  (434.15): Calcd C 16.60, H 0.46, N 38.72; found: C 16.49, H 0.64, N 38.45.

### General procedures for the preparation of energetic salts (**2a-2b**)

Compound **2** (0.87 g, 2 mmol) was suspended in water and 2.2 equivalents of bases (aqueous ammonia, water solution of aminoguanidine bicarbonate) were dropped at room temperature. The reaction was stirred 1h the formed precipitate was collected by filtration. The crude product was purified by recrystallization from water solution.

**2a**: Yellow solid. (0.65 g, yield: 78 %).  $T_d$  (onset): 180 °C.  $^1\text{H}$  NMR (300 MHz, MeOD):  $\delta = 7.30$  (s, 8H) ppm;  $^{13}\text{C}$  NMR (76 MHz, MeOD):  $\delta = 146.8, 126.7, 126.6$  ppm; IR (KBr):  $\tilde{\nu}$  3289, 2974, 2894, 1731, 1627, 1604, 1519, 1472, 1406, 1312, 1170, 1138, 987, 831, 794, 747, 713, 534  $\text{cm}^{-1}$ . Elemental analysis for  $\text{C}_6\text{H}_8\text{N}_{14}\text{O}_{12}$  (468.22): Calcd C 15.39, H 1.72, N 41.88. Found: C 15.55, H 2.00, N 41.73.

**2b**: Yellow solid. (0.89 g, yield: 76 %).  $T_d$  (onset): 200 °C.  $^1\text{H}$  NMR (300 MHz, MeOD):  $\delta = 7.08$  (s,

2H), 4.64 (s, 2H) ppm;  $^{13}\text{C}$  NMR (76 MHz, MeOD):  $\delta = 160.5, 146.6, 126.5, 126.4$  ppm; IR (KBr):  $\tilde{\nu}$  3605, 3252, 3049, 2851, 1608, 1537, 1400, 1353, 1259, 1080, 1043, 991, 925, 897, 840, 803, 746, 732, 553  $\text{cm}^{-1}$ . Elemental analysis for  $\text{C}_8\text{H}_{14}\text{N}_{20}\text{O}_{12}$  (582.33): Calcd C 16.50, H 2.42, N 48.11. Found: C 16.72, H 2.60, N 47.98.

**Table S7. Densities and detonation velocities of 2a and representative ammonium salts of nitroamine compounds.**

| Compounds | Molecular structures                                                                | Density (298 K) | Detonation velocity ( $\text{m s}^{-1}$ ) | Ref       |
|-----------|-------------------------------------------------------------------------------------|-----------------|-------------------------------------------|-----------|
| 2a        | 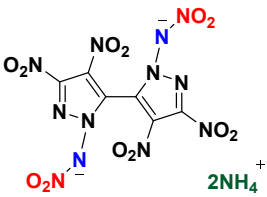   | 1.88            | 9134                                      | This work |
| A         |   | 1.78            | 8745                                      | [1]       |
| B         |  | 1.77            | 8865                                      | [2]       |
| C         |  | 1.827           | 8796                                      | [3]       |
| D         |  | 1.795           | 9438                                      | [4]       |
| E         |  | 1.81            | 8999                                      | [5]       |

|   |  |       |      |      |
|---|--|-------|------|------|
| F |  | 1.757 | 8809 | [6]  |
| G |  | 1.67  | 8625 | [7]  |
| H |  | 1.75  | 8883 | [8]  |
| I |  | 1.82  | 9194 | [8]  |
| J |  | 1.729 | 8430 | [9]  |
| K |  | 1.753 | 9396 | [4]  |
| L |  | 1.80  | 8982 | [10] |
| M |  | 1.74  | 8816 | [10] |
| N |  | 1.689 | 9067 | [11] |
| O |  | 1.77  | 8773 | [10] |

|   |                                                                                   |       |      |      |
|---|-----------------------------------------------------------------------------------|-------|------|------|
| P | 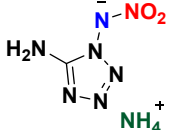 | 1.757 | 9111 | [12] |
|---|-----------------------------------------------------------------------------------|-------|------|------|

## 5. Crystal structure data

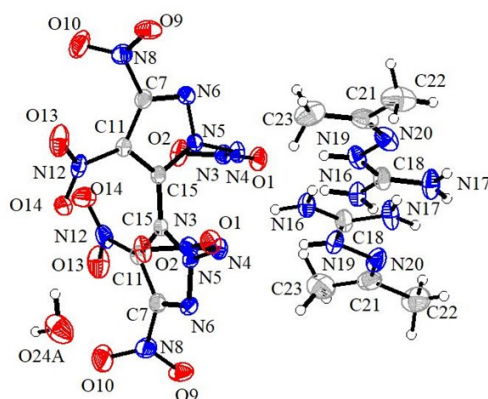

Figure S1. single-crystal X-ray structure of **2b**·0.65H<sub>2</sub>O

Crystals of **2b**·0.65H<sub>2</sub>O suitable for X-ray diffraction were obtained by slow evaporation of its saturated solutions in acetone at room temperature. Notably, during the crystal growth process, aminoguanidinium reacted with the acetone solvent. Although the crystal quality was suboptimal, the fundamental structure of **2b** was unequivocally confirmed.

**Table S8.** Crystal data and structure refinement for **2a**·0.67H<sub>2</sub>O.

| compound                                    | <b>2a</b> ·0.67H <sub>2</sub> O                                |
|---------------------------------------------|----------------------------------------------------------------|
| Empirical formula                           | C <sub>18</sub> H <sub>28</sub> N <sub>4</sub> O <sub>38</sub> |
| Formula weight                              | 1440.82                                                        |
| Temperature [K]                             | 130(2)                                                         |
| Crystal system                              | Monoclinic                                                     |
| Space group                                 | C2/c (15)                                                      |
| <i>a</i> [Å]                                | 8.6521(11)                                                     |
| <i>b</i> [Å]                                | 28.997(2)                                                      |
| <i>c</i> [Å]                                | 21.0931(19)                                                    |
| <i>α</i> [°]                                | 90                                                             |
| <i>β</i> [°]                                | 103.523(4)                                                     |
| <i>γ</i> [°]                                | 90                                                             |
| <i>V</i> [Å <sup>3</sup> ]                  | 5203.0(9)                                                      |
| <i>Z</i>                                    | 4                                                              |
| $\rho_{\text{calcd}}$ [Mg·m <sup>-3</sup> ] | 1.839                                                          |

|                                              |                                                             |
|----------------------------------------------|-------------------------------------------------------------|
| $\mu/\text{mm}^{-1}$                         | 1.573                                                       |
| F(000)                                       | 2936                                                        |
| Crystal size                                 | $0.15 \times 0.1 \times 0.1 \text{ mm}^3$                   |
| Theta range for data collection              | 6.10 to 136.80 (0.83 Å)                                     |
| index ranges                                 | $-8 \leq h \leq 10, -34 \leq k \leq 34, -25 \leq l \leq 25$ |
| reflections collected                        | 17903                                                       |
| independent reflections ( $R_{\text{int}}$ ) | 4711 [ $R_{\text{int}} = 0.0512$ ]                          |
| data / restraints / parameters               | 4711/1342/491                                               |
| GOF on $F^2$                                 | 1.145                                                       |
| Final R indices [ $I \geq 2\sigma(I)$ ]      | $R_1 = 0.0655, wR_2 = 0.1722$                               |
| R indices [all data]                         | $R_1 = 0.0682, wR_2 = 0.1736$                               |
| CCDC number                                  | 2418270                                                     |

**Table S9.** Fractional Atomic Coordinates ( $\times 10^4$ ) and Equivalent Isotropic Displacement Parameters ( $\text{Å}^2 \times 10^3$ ) for  $2\mathbf{a} \cdot 0.67\text{H}_2\text{O}$ .  $U_{\text{eq}}$  is defined as 1/3 of the trace of the orthogonalized  $U_{ij}$  tensor.

|     | <b>x</b>  | <b>y</b>    | <b>z</b>    | <b>U<sub>eq</sub></b> |
|-----|-----------|-------------|-------------|-----------------------|
| C1  | 0.6662(4) | 0.84551(12) | 0.43478(17) | 0.0183(7)             |
| C2  | 0.9086(4) | 0.86346(12) | 0.47777(17) | 0.0180(7)             |
| C3  | 0.7611(4) | 0.85531(12) | 0.49315(17) | 0.0171(7)             |
| C4  | 0.5005(4) | 0.83248(12) | 0.41701(17) | 0.0185(7)             |
| C5  | 0.4216(4) | 0.79251(12) | 0.42579(18) | 0.0194(7)             |
| C6  | 0.2697(4) | 0.79886(12) | 0.39149(18) | 0.0192(7)             |
| C7  | 0.3588(4) | 0.52416(12) | 0.11384(17) | 0.0176(7)             |
| C8  | 0.4748(4) | 0.50705(12) | 0.16303(17) | 0.0171(7)             |
| C9  | 0.4568(4) | 0.53211(11) | 0.21685(17) | 0.0154(7)             |
| N1S | 0.7606(4) | 0.84787(11) | 0.39037(15) | 0.0215(6)             |
| N2  | 0.9092(4) | 0.85927(11) | 0.41576(15) | 0.0227(7)             |
| N3  | 0.2516(4) | 0.84008(10) | 0.36395(15) | 0.0195(6)             |
| N4  | 0.3924(3) | 0.85952(9)  | 0.37985(14) | 0.0159(6)             |
| N5  | 0.7220(4) | 0.84282(13) | 0.32338(16) | 0.0307(8)             |
| N6  | 0.6948(4) | 0.79817(13) | 0.30919(16) | 0.0313(8)             |
| N7  | 1.0548(3) | 0.87854(10) | 0.51898(14) | 0.0180(6)             |
| N8  | 0.7137(3) | 0.85211(10) | 0.55488(14) | 0.0174(6)             |
| N9  | 0.4941(4) | 0.75222(11) | 0.45762(19) | 0.0313(8)             |
| N10 | 0.1366(4) | 0.76853(11) | 0.38124(17) | 0.0264(7)             |
| N11 | 0.4166(4) | 0.90160(10) | 0.35173(15) | 0.0229(7)             |
| N12 | 0.4249(3) | 0.93464(10) | 0.39515(14) | 0.0173(6)             |



---

|       |            |             |             |            |
|-------|------------|-------------|-------------|------------|
| N13   | 0.3357(3)  | 0.56124(10) | 0.19641(14) | 0.0173(6)  |
| N14   | 0.2728(4)  | 0.55669(10) | 0.13437(15) | 0.0191(6)  |
| N15   | 0.3165(4)  | 0.50926(11) | 0.04754(15) | 0.0222(7)  |
| N16   | 0.5986(3)  | 0.47402(10) | 0.16122(14) | 0.0178(6)  |
| N17   | 0.2827(4)  | 0.59685(10) | 0.23208(15) | 0.0223(7)  |
| N18   | 0.2003(4)  | 0.57842(11) | 0.27360(15) | 0.0211(7)  |
| O1    | 0.6754(4)  | 0.78909(14) | 0.25046(15) | 0.0504(10) |
| O2    | 1.1776(3)  | 0.86742(10) | 0.50370(14) | 0.0265(6)  |
| O3    | 0.8154(3)  | 0.84370(9)  | 0.60218(12) | 0.0259(6)  |
| O4    | 0.4472(4)  | 0.71463(10) | 0.4361(2)   | 0.0564(10) |
| O5    | 0.1342(4)  | 0.73700(11) | 0.41918(16) | 0.0394(8)  |
| O6    | 0.4217(4)  | 0.92802(10) | 0.45205(14) | 0.0376(8)  |
| O7    | 0.6873(3)  | 0.76779(10) | 0.35028(14) | 0.0320(7)  |
| O8    | 1.0421(3)  | 0.90265(9)  | 0.56539(13) | 0.0259(6)  |
| O9    | 0.5737(3)  | 0.85699(10) | 0.55645(13) | 0.0265(6)  |
| O10   | 0.6002(4)  | 0.75839(12) | 0.50451(17) | 0.0443(9)  |
| O11   | 0.0335(3)  | 0.77578(10) | 0.33399(16) | 0.0346(7)  |
| O12   | 0.4383(3)  | 0.97473(8)  | 0.37313(13) | 0.0237(6)  |
| O13   | 0.2250(4)  | 0.53302(10) | 0.01063(13) | 0.0321(7)  |
| O14   | 0.6644(3)  | 0.47405(10) | 0.11495(13) | 0.0271(6)  |
| O15   | 0.1782(3)  | 0.53655(9)  | 0.27904(13) | 0.0251(6)  |
| O16   | 0.3735(4)  | 0.47285(10) | 0.03338(14) | 0.0334(7)  |
| O17   | 0.6339(3)  | 0.44867(8)  | 0.20842(13) | 0.0233(6)  |
| O18   | 0.1463(3)  | 0.60747(9)  | 0.30820(13) | 0.0280(6)  |
| N1_1  | 0.3956(4)  | 0.94460(10) | 0.57978(14) | 0.0196(6)  |
| H1A_1 | 0.440(3)   | 0.9275(8)   | 0.5557(12)  | 0.029      |
| H1B_1 | 0.394(4)   | 0.9307(9)   | 0.6153(8)   | 0.029      |
| H1C_1 | 0.447(3)   | 0.9697(6)   | 0.5875(14)  | 0.029      |
| H1D_1 | 0.3018(15) | 0.9505(10)  | 0.5612(13)  | 0.029      |
| O1_2  | 0.6051(4)  | 0.81230(11) | 0.70608(17) | 0.0425(8)  |
| H1A_2 | 0.651(7)   | 0.8371(12)  | 0.699(2)    | 0.064      |
| H1B_2 | 0.561(7)   | 0.8031(18)  | 0.6689(12)  | 0.064      |
| N1_5  | -0.008(6)  | 0.86038(19) | 0.252(2)    | 0.022(3)   |
| H1A_5 | -0.042330  | 0.849811    | 0.214809    | 0.034      |
| H1B_5 | 0.033526   | 0.886669    | 0.249671    | 0.034      |
| H1C_5 | -0.083795  | 0.862814    | 0.272911    | 0.034      |
| H1D_5 | 0.060506   | 0.841833    | 0.272602    | 0.034      |
| N1_8  | 0.4497(10) | 0.6998(3)   | 0.2663(4)   | 0.0301(19) |

---

|       |           |           |            |            |
|-------|-----------|-----------|------------|------------|
| H1A_8 | 0.381798  | 0.679299  | 0.270490   | 0.045      |
| H1B_8 | 0.504402  | 0.706230  | 0.302900   | 0.045      |
| H1C_8 | 0.509359  | 0.689777  | 0.241426   | 0.045      |
| H1D_8 | 0.402558  | 0.724044  | 0.249792   | 0.045      |
| N1_7  | 0.3402(8) | 0.6845(2) | 0.3182(3)  | 0.0272(16) |
| H1A_7 | 0.343763  | 0.655693  | 0.310822   | 0.041      |
| H1B_7 | 0.245071  | 0.693211  | 0.313913   | 0.041      |
| H1C_7 | 0.387665  | 0.690112  | 0.356455   | 0.041      |
| H1D_7 | 0.385544  | 0.699123  | 0.291581   | 0.041      |
| N1_6  | 0.505(6)  | 0.9492(2) | 0.2549(18) | 0.019(3)   |
| H1A_6 | 0.596081  | 0.938097  | 0.268547   | 0.029      |
| H1B_6 | 0.470585  | 0.962032  | 0.285804   | 0.029      |
| H1C_6 | 0.509878  | 0.968949  | 0.225511   | 0.029      |
| H1D_6 | 0.442804  | 0.927452  | 0.239347   | 0.029      |

**Table S10.** Bond lengths [ $\text{\AA}$ ] and angles [ $^\circ$ ] for  $2\mathbf{a}\cdot 0.67\text{H}_2\text{O}$

| <b>Atom</b>         | <b>Lengths/<math>\text{\AA}</math></b> | <b>Atom</b> | <b>Angles/<math>^\circ</math></b> |
|---------------------|----------------------------------------|-------------|-----------------------------------|
| C1–N1S              | 1.352(5)                               | N1S–C1–C3   | 105.8(3)                          |
| C1–C3               | 1.379(5)                               | N1S–C1–C4   | 121.5(3)                          |
| C1–C4               | 1.463(5)                               | C3–C1–C4    | 132.6(3)                          |
| C2–N2               | 1.314(5)                               | N2–C2–C3    | 112.7(3)                          |
| C2–C3               | 1.394(5)                               | N2–C2–N7    | 117.3(3)                          |
| C2–N7               | 1.464(5)                               | C3–C2–N7    | 129.8(3)                          |
| C3–N8               | 1.438(5)                               | C1–C3–C2    | 104.4(3)                          |
| C4–N4               | 1.355(5)                               | C1–C3–N8    | 125.0(3)                          |
| C4–C5               | 1.375(5)                               | C2–C3–N8    | 130.3(3)                          |
| C5–C6               | 1.392(5)                               | N4–C4–C5    | 105.0(3)                          |
| C5–N9               | 1.434(5)                               | N4–C4–C1    | 122.6(3)                          |
| C6–N3               | 1.326(5)                               | C5–C4–C1    | 132.1(3)                          |
| C6–N10              | 1.433(5)                               | C4–C5–C6    | 105.3(3)                          |
| C7–N14              | 1.322(5)                               | C4–C5–N9    | 124.4(3)                          |
| C7–C8               | 1.396(5)                               | C6–C5–N9    | 129.9(3)                          |
| C7–N15              | 1.446(5)                               | N3–C6–C5    | 111.8(3)                          |
| C8–C9               | 1.380(5)                               | N3–C6–N10   | 117.4(3)                          |
| C8–N16              | 1.443(5)                               | C5–C6–N10   | 130.8(3)                          |
| C9–N13              | 1.354(5)                               | N14–C7–C8   | 112.4(3)                          |
| C9–C9 <sup>#1</sup> | 1.460(7)                               | N14–C7–N15  | 118.1(3)                          |
| N1S–N2              | 1.341(4)                               | C8–C7–N15   | 129.3(3)                          |

|         |          |           |          |
|---------|----------|-----------|----------|
| N1S–N5  | 1.399(5) | C9–C8–C7  | 104.5(3) |
| N3–N4   | 1.329(4) | C9–C8–N16 | 124.5(3) |
| N4–N11  | 1.389(4) | C7–C8–N16 | 130.7(3) |
| N5–N6   | 1.340(5) | N13–C9–C8 | 105.3(3) |
| N6–O7   | 1.246(4) | N13–C9–C9 | 122.4(3) |
| N6–O1   | 1.248(4) | C8–C9–C9  | 132.3(3) |
| N7–O2   | 1.210(4) | N2–N1S–C1 | 113.1(3) |
| N7–O8   | 1.224(4) | N2–N1S–N5 | 117.6(3) |
| N8–O9   | 1.226(4) | C1–N1S–N5 | 129.2(3) |
| N8–O3   | 1.228(4) | C2–N2–N1S | 104.0(3) |
| N9–O4   | 1.221(5) | C6–N3–N4  | 104.0(3) |
| N9–O10  | 1.234(5) | N3–N4–C4  | 113.9(3) |
| N10–O5  | 1.218(5) | N3–N4–N11 | 117.9(3) |
| N10–O11 | 1.229(5) | C4–N4–N11 | 127.8(3) |
| N11–N12 | 1.318(4) | N6–N5–N1S | 109.1(3) |
| N12–O6  | 1.221(4) | O7–N6–O1  | 121.8(4) |
| N12–O12 | 1.265(4) | O7–N6–N5  | 123.9(3) |
| N13–N14 | 1.329(4) | O1–N6–N5  | 114.3(3) |
| N13–N17 | 1.403(4) | O2–N7–O8  | 125.2(3) |
| N15–O13 | 1.217(4) | O2–N7–C2  | 117.9(3) |
| N15–O16 | 1.225(4) | O8–N7–C2  | 116.8(3) |
| N16–O14 | 1.216(4) | O9–N8–O3  | 124.5(3) |
| N16–O17 | 1.230(4) | O9–N8–C3  | 117.6(3) |
| N17–N18 | 1.338(4) | O3–N8–C3  | 117.9(3) |
| N18–O15 | 1.238(4) | O4–N9–O10 | 125.1(4) |
| N18–O18 | 1.259(4) | O4–N9–C5  | 117.8(4) |

**Table S11.** Anisotropic displacement parameters ( $\text{\AA}^2 \times 10^3$ ) for  $2\mathbf{a} \cdot 0.67\text{H}_2\text{O}$ . The anisotropic displacement factor exponent takes the form:  $-2\pi^2 [h^2 a^* U^{11} + \dots + 2 h k a^* b^* U^{12}]$ .

|    | U11        | U22        | U33        | U23         | U13        | U12         |
|----|------------|------------|------------|-------------|------------|-------------|
| C1 | 0.0179(15) | 0.0174(15) | 0.0203(16) | 0.0046(13)  | 0.0050(13) | -0.0040(13) |
| C2 | 0.0156(16) | 0.0181(15) | 0.0207(16) | -0.0006(13) | 0.0046(13) | -0.0030(13) |
| C3 | 0.0159(15) | 0.0161(15) | 0.0198(16) | 0.0022(13)  | 0.0046(13) | -0.0002(12) |
| C4 | 0.0171(16) | 0.0182(15) | 0.0209(16) | 0.0018(13)  | 0.0049(13) | -0.0003(13) |
| C5 | 0.0166(16) | 0.0149(15) | 0.0291(17) | 0.0047(13)  | 0.0103(13) | 0.0020(13)  |
| C6 | 0.0178(16) | 0.0150(15) | 0.0270(17) | -0.0042(13) | 0.0101(14) | -0.0004(13) |
| C7 | 0.0186(16) | 0.0136(15) | 0.0217(17) | 0.0010(13)  | 0.0066(13) | -0.0020(13) |
| C8 | 0.0165(16) | 0.0138(15) | 0.0220(16) | -0.0003(13) | 0.0063(13) | -0.0031(13) |

---

|      |            |            |            |             |             |             |
|------|------------|------------|------------|-------------|-------------|-------------|
| C9   | 0.0182(16) | 0.0100(14) | 0.0193(16) | 0.0007(12)  | 0.0071(13)  | -0.0002(12) |
| N1S  | 0.0178(14) | 0.0287(15) | 0.0180(14) | 0.0027(12)  | 0.0031(11)  | -0.0103(12) |
| N2   | 0.0176(15) | 0.0273(15) | 0.0233(15) | -0.0009(12) | 0.0041(12)  | -0.0070(12) |
| N3   | 0.0183(14) | 0.0183(14) | 0.0221(14) | -0.0050(11) | 0.0038(12)  | 0.0004(11)  |
| N4   | 0.0194(14) | 0.0093(12) | 0.0181(13) | 0.0010(10)  | 0.0014(11)  | -0.0023(11) |
| N5   | 0.0298(17) | 0.0428(19) | 0.0196(15) | 0.0015(14)  | 0.0052(13)  | -0.0173(15) |
| N6   | 0.0303(18) | 0.044(2)   | 0.0206(17) | -0.0026(15) | 0.0080(14)  | -0.0197(16) |
| N7   | 0.0167(15) | 0.0140(13) | 0.0235(15) | -0.0001(12) | 0.0039(12)  | -0.0025(11) |
| N8   | 0.0169(15) | 0.0148(13) | 0.0206(15) | 0.0004(11)  | 0.0036(12)  | -0.0008(11) |
| N9   | 0.0234(17) | 0.0207(17) | 0.055(2)   | 0.0190(15)  | 0.0218(16)  | 0.0079(13)  |
| N10  | 0.0188(16) | 0.0220(16) | 0.0414(19) | -0.0080(14) | 0.0133(15)  | -0.0035(13) |
| N11  | 0.0398(17) | 0.0109(13) | 0.0172(14) | 0.0013(11)  | 0.0029(13)  | -0.0017(12) |
| N12  | 0.0173(14) | 0.0148(14) | 0.0209(15) | -0.0018(11) | 0.0060(12)  | -0.0001(11) |
| N13  | 0.0192(14) | 0.0128(13) | 0.0209(14) | 0.0010(11)  | 0.0065(12)  | 0.0019(11)  |
| N14  | 0.0194(14) | 0.0171(14) | 0.0221(15) | 0.0019(11)  | 0.0073(12)  | -0.0007(11) |
| N15  | 0.0199(15) | 0.0208(15) | 0.0258(16) | -0.0035(13) | 0.0035(13)  | -0.0023(12) |
| N16  | 0.0181(14) | 0.0134(13) | 0.0226(15) | -0.0030(12) | 0.0059(12)  | -0.0016(11) |
| N17  | 0.0331(17) | 0.0146(14) | 0.0232(15) | 0.0032(12)  | 0.0153(13)  | 0.0065(12)  |
| N18  | 0.0190(15) | 0.0241(16) | 0.0207(15) | 0.0066(12)  | 0.0051(12)  | 0.0071(12)  |
| O1   | 0.057(2)   | 0.074(2)   | 0.0221(16) | -0.0146(16) | 0.0130(15)  | -0.0367(19) |
| O2   | 0.0140(13) | 0.0320(15) | 0.0349(15) | -0.0072(12) | 0.0081(11)  | -0.0032(11) |
| O3   | 0.0252(14) | 0.0316(15) | 0.0199(13) | 0.0031(11)  | 0.0010(11)  | 0.0041(11)  |
| O4   | 0.051(2)   | 0.0154(15) | 0.111(3)   | 0.0106(17)  | 0.036(2)    | 0.0047(14)  |
| O5   | 0.0377(18) | 0.0374(17) | 0.0474(18) | 0.0018(14)  | 0.0192(14)  | -0.0169(14) |
| O6   | 0.067(2)   | 0.0281(15) | 0.0234(15) | -0.0047(12) | 0.0223(14)  | -0.0058(14) |
| O7   | 0.0313(16) | 0.0365(16) | 0.0298(15) | -0.0037(12) | 0.0101(12)  | -0.0122(12) |
| O8   | 0.0218(14) | 0.0280(14) | 0.0273(14) | -0.0080(11) | 0.0026(11)  | -0.0030(11) |
| O9   | 0.0167(13) | 0.0335(15) | 0.0319(15) | 0.0026(12)  | 0.0110(11)  | 0.0021(11)  |
| O10  | 0.0232(16) | 0.054(2)   | 0.058(2)   | 0.0356(17)  | 0.0135(15)  | 0.0152(14)  |
| O11  | 0.0185(14) | 0.0264(15) | 0.0551(19) | -0.0061(13) | -0.0030(13) | -0.0031(11) |
| O12  | 0.0302(15) | 0.0111(12) | 0.0300(14) | 0.0006(10)  | 0.0060(11)  | -0.0004(10) |
| O13  | 0.0382(17) | 0.0317(15) | 0.0235(14) | 0.0009(12)  | -0.0018(12) | 0.0053(13)  |
| O14  | 0.0257(14) | 0.0319(15) | 0.0261(14) | -0.0036(11) | 0.0113(12)  | 0.0036(11)  |
| O15  | 0.0217(14) | 0.0221(13) | 0.0330(15) | 0.0078(11)  | 0.0089(11)  | -0.0004(11) |
| O16  | 0.0356(16) | 0.0288(15) | 0.0334(16) | -0.0150(12) | -0.0004(13) | 0.0041(12)  |
| O17  | 0.0236(13) | 0.0161(12) | 0.0308(15) | 0.0024(11)  | 0.0065(11)  | 0.0036(10)  |
| O18  | 0.0370(16) | 0.0269(14) | 0.0231(14) | 0.0054(11)  | 0.0138(12)  | 0.0155(12)  |
| N1_1 | 0.0219(16) | 0.0209(15) | 0.0178(15) | -0.0016(12) | 0.0078(12)  | -0.0014(12) |

---

|      |          |            |          |             |            |             |
|------|----------|------------|----------|-------------|------------|-------------|
| O1_2 | 0.043(2) | 0.0300(17) | 0.058(2) | -0.0157(15) | 0.0181(17) | -0.0122(14) |
| N1_5 | 0.020(7) | 0.017(2)   | 0.028(6) | 0.002(6)    | 0.000(4)   | 0.000(6)    |
| N1_8 | 0.031(4) | 0.023(4)   | 0.035(4) | 0.002(3)    | 0.001(3)   | -0.005(3)   |
| N1_7 | 0.036(3) | 0.021(3)   | 0.022(3) | -0.005(2)   | 0.000(2)   | -0.007(2)   |
| N1_6 | 0.028(4) | 0.020(2)   | 0.012(8) | 0.001(5)    | 0.008(5)   | 0.004(6)    |

**Table S12.** Torsion angles [ $^{\circ}$ ] for **2a** $\cdot$ 0.67H<sub>2</sub>O.

| Atom                       | Angles/ $^{\circ}$ | Atom                         | Angles/ $^{\circ}$ |
|----------------------------|--------------------|------------------------------|--------------------|
| N1S-C1-C3-C2               | 0.7(4)             | N2-N1S-N5-N6                 | 110.5(4)           |
| C4-C1-C3-C2                | 177.7(4)           | C1-N1S-N5-N6                 | -73.8(5)           |
| N1S-C1-C3-N8               | -173.3(3)          | N1S-N5-N6-O7                 | 7.9(5)             |
| C4-C1-C3-N8                | 3.7(6)             | N1S-N5-N6-O1                 | -172.9(3)          |
| N2-C2-C3-C1                | -0.1(4)            | N2-C2-N7-O2                  | -31.8(5)           |
| N7-C2-C3-C1                | 175.3(3)           | C3-C2-N7-O2                  | 152.9(4)           |
| N2-C2-C3-N8                | 173.4(3)           | N2-C2-N7-O8                  | 146.2(3)           |
| N7-C2-C3-N8                | -11.1(6)           | C3-C2-N7-O8                  | -29.1(5)           |
| N1S-C1-C4-N4               | -67.8(5)           | C1-C3-N8-O9                  | -26.8(5)           |
| C3-C1-C4-N4                | 115.6(4)           | C2-C3-N8-O9                  | 160.9(4)           |
| N1S-C1-C4-C5               | 104.9(5)           | C1-C3-N8-O3                  | 151.7(3)           |
| C3-C1-C4-C5                | -71.7(6)           | C2-C3-N8-O3                  | -20.7(5)           |
| N4-C4-C5-C6                | 0.9(4)             | C4-C5-N9-O4                  | -142.4(4)          |
| C1-C4-C5-C6                | -172.8(4)          | C6-C5-N9-O4                  | 29.2(6)            |
| N4-C4-C5-N9                | 174.2(3)           | C4-C5-N9-O10                 | 37.0(5)            |
| C1-C4-C5-N9                | 0.6(7)             | C6-C5-N9-O10                 | -151.4(4)          |
| C4-C5-C6-N3                | -1.2(4)            | N3-C6-N10-O5                 | -159.5(3)          |
| N9-C5-C6-N3                | -174.0(4)          | C5-C6-N10-O5                 | 21.6(6)            |
| C4-C5-C6-N10               | 177.8(4)           | N3-C6-N10-O11                | 21.6(5)            |
| N9-C5-C6-N10               | 5.0(7)             | C5-C6-N10-O11                | -157.3(4)          |
| N14-C7-C8-C9               | -0.9(4)            | N3-N4-N11-N12                | 108.1(3)           |
| N15-C7-C8-C9               | -176.4(3)          | C4-N4-N11-N12                | -79.8(4)           |
| N14-C7-C8-N16              | -175.6(3)          | N4-N11-N12-O6                | 4.3(5)             |
| N15-C7-C8-N16              | 8.9(6)             | N4-N11-N12-O12               | -176.4(3)          |
| C7-C8-C9-N13               | 0.0(4)             | C8-C9-N13-N14                | 0.9(4)             |
| N16-C8-C9-N13              | 175.2(3)           | C9 <sup>#1</sup> -C9-N13-N14 | 179.1(3)           |
| C7-C8-C9-C9 <sup>#1</sup>  | -178.0(4)          | C8-C9-N13-N17                | -173.3(3)          |
| N16-C8-C9-C9 <sup>#1</sup> | -2.8(6)            | C9 <sup>#1</sup> -C9-N13-N17 | 4.9(5)             |
| C3-C1-N1S-N2               | -1.1(4)            | C8-C7-N14-N13                | 1.4(4)             |
| C4-C1-N1S-N2               | -178.5(3)          | N15-C7-N14-N13               | 177.4(3)           |

---

|              |           |                 |           |
|--------------|-----------|-----------------|-----------|
| C3-C1-N1S-N5 | -176.9(4) | C9-N13-N14-C7   | -1.4(4)   |
| C4-C1-N1S-N5 | 5.6(6)    | N17-N13-N14-C7  | 173.3(3)  |
| C3-C2-N2-N1S | -0.5(4)   | N14-C7-N15-O13  | 14.1(5)   |
| N7-C2-N2-N1S | -176.6(3) | C8-C7-N15-O13   | -170.6(4) |
| C1-N1S-N2-C2 | 1.0(4)    | N14-C7-N15-O16  | -164.3(3) |
| N5-N1S-N2-C2 | 177.4(3)  | C8-C7-N15-O16   | 11.0(5)   |
| C5-C6-N3-N4  | 1.0(4)    | C9-C8-N16-O14   | -136.8(4) |
| N10-C6-N3-N4 | -178.1(3) | C7-C8-N16-O14   | 36.9(5)   |
| C6-N3-N4-C4  | -0.4(4)   | C9-C8-N16-O17   | 40.6(5)   |
| C6-N3-N4-N11 | 172.8(3)  | C7-C8-N16-O17   | -145.6(4) |
| C5-C4-N4-N3  | -0.3(4)   | N14-N13-N17-N18 | 109.5(3)  |
| C1-C4-N4-N3  | 174.1(3)  | C9-N13-N17-N18  | -76.6(4)  |
| C5-C4-N4-N11 | -172.7(3) | N13-N17-N18-O15 | 0.9(5)    |
| C1-C4-N4-N11 | 1.7(6)    | N13-N17-N18-O18 | -179.8(3) |

---

## 6. NMR spectra

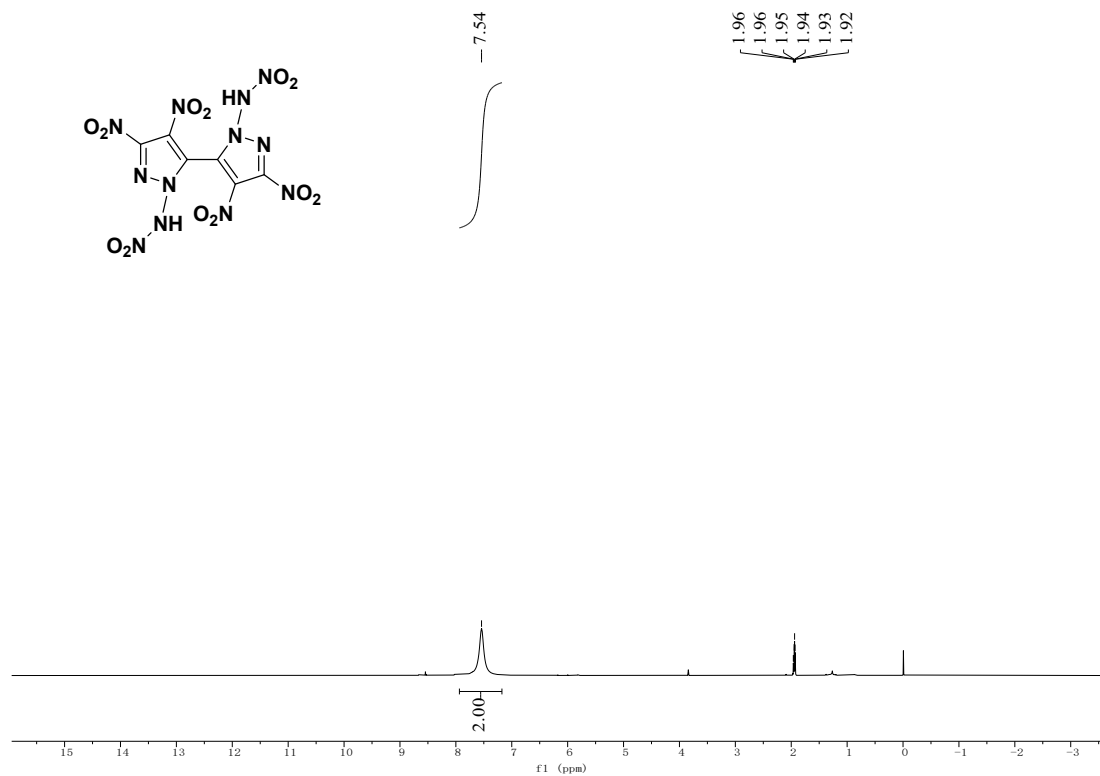

Figure S2. <sup>1</sup>H NMR spectrum of 2

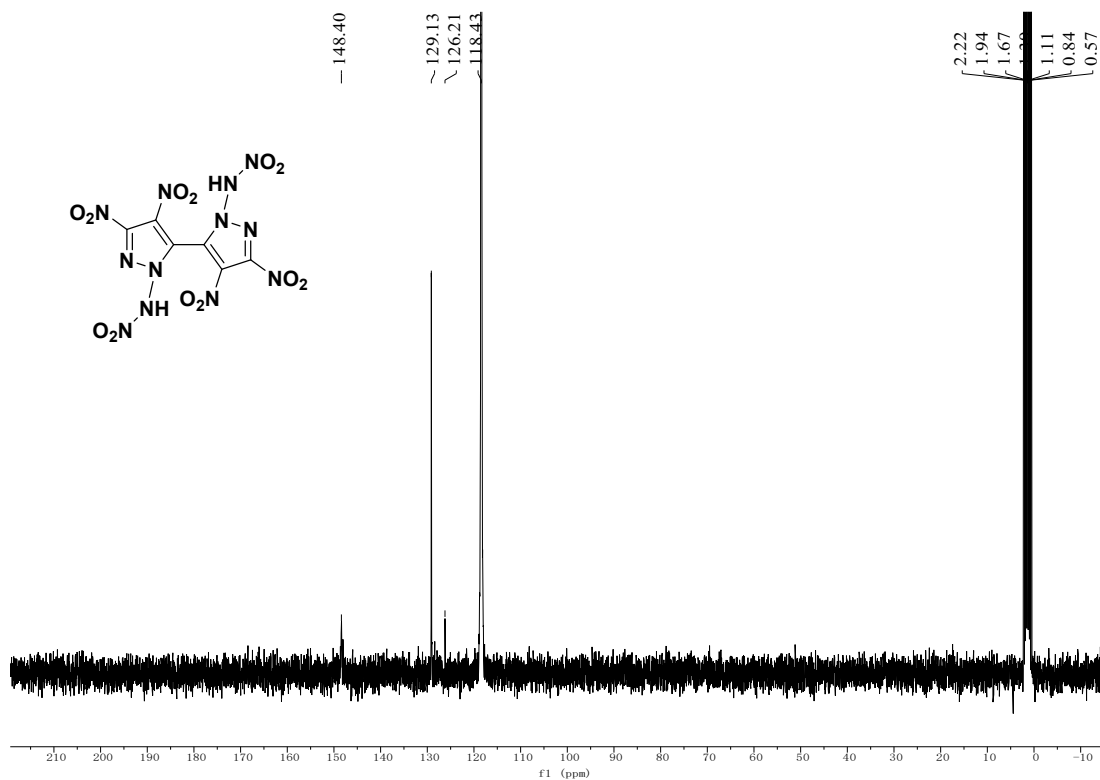

Figure S3. <sup>13</sup>C NMR spectrum of 2

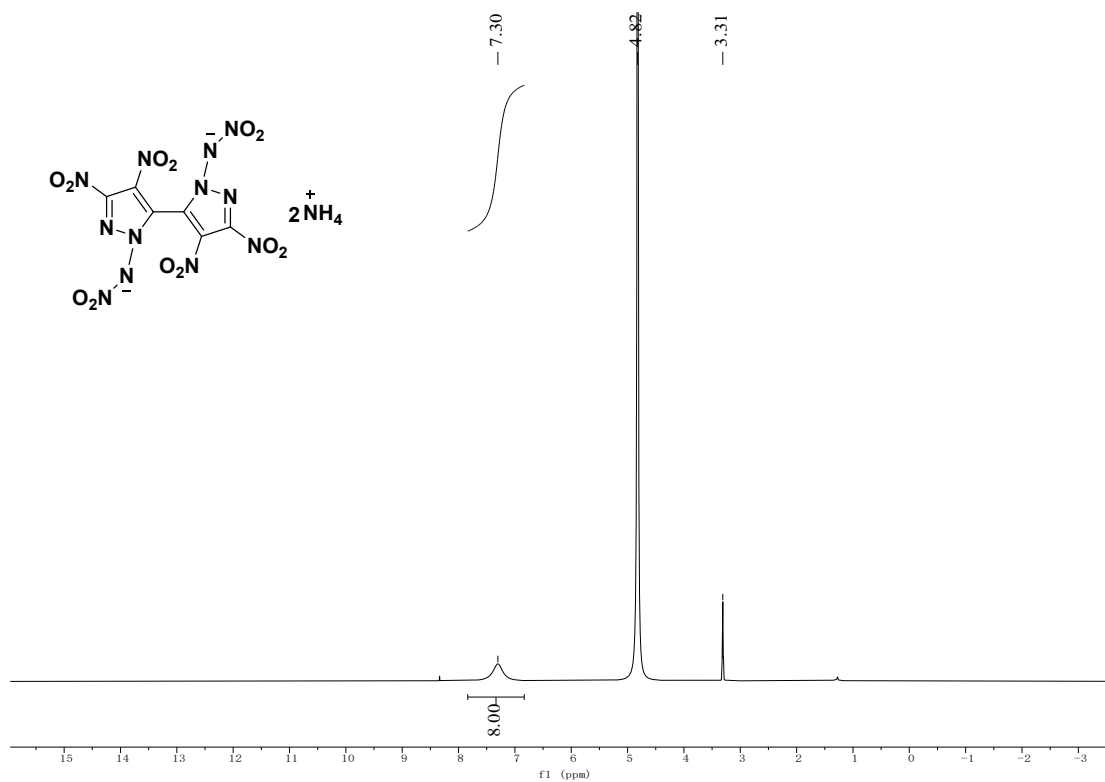

Figure S4.  $^1\text{H NMR}$  spectrum of **2a**

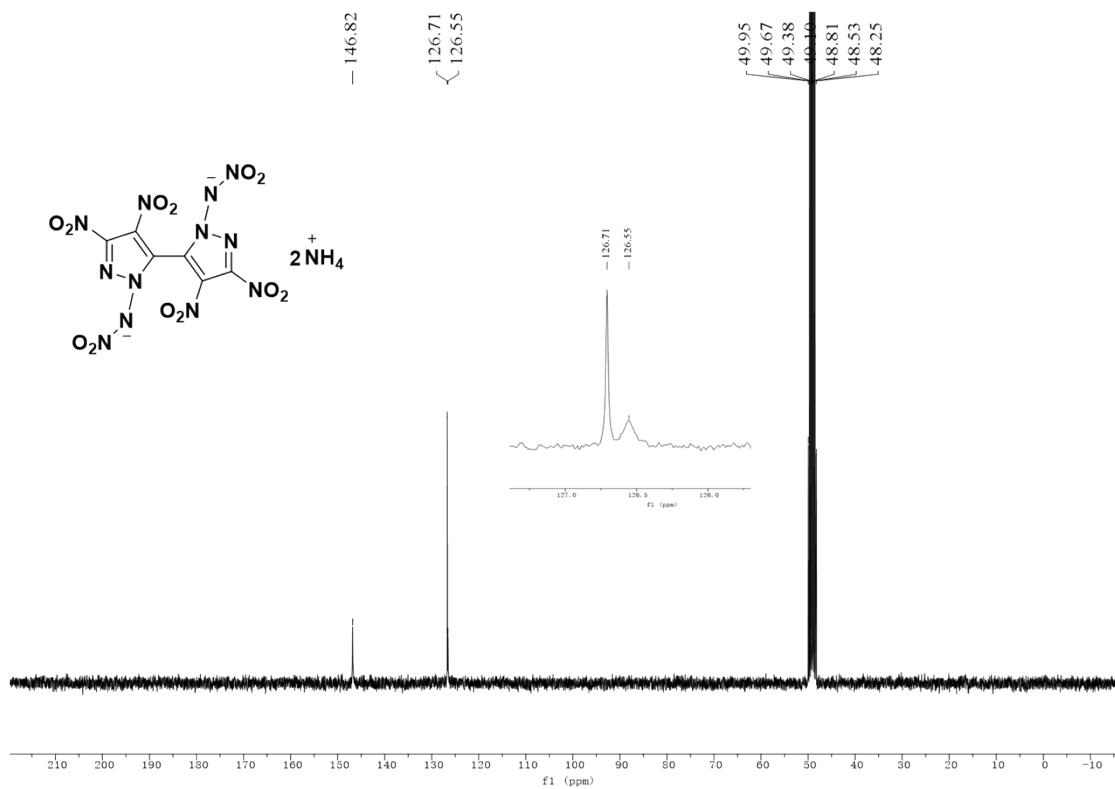

Figure S5.  $^{13}\text{C NMR}$  spectrum of **2a**



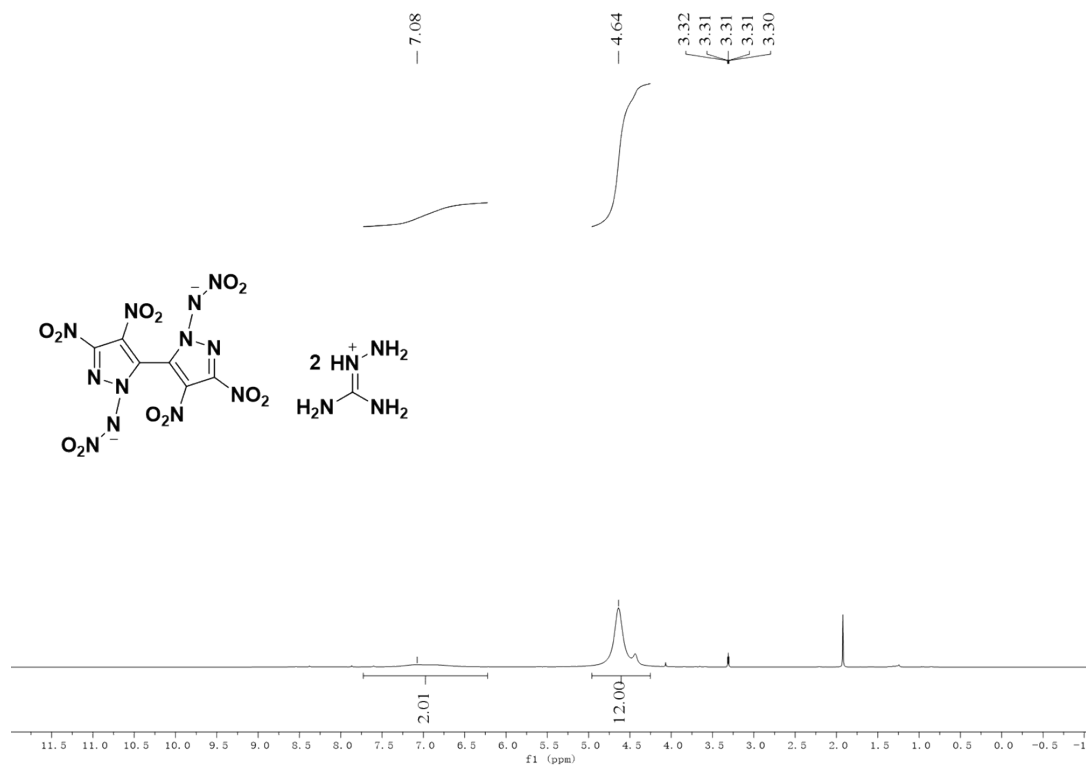

Figure S6.  $^1\text{H}$  NMR spectrum of **2b**

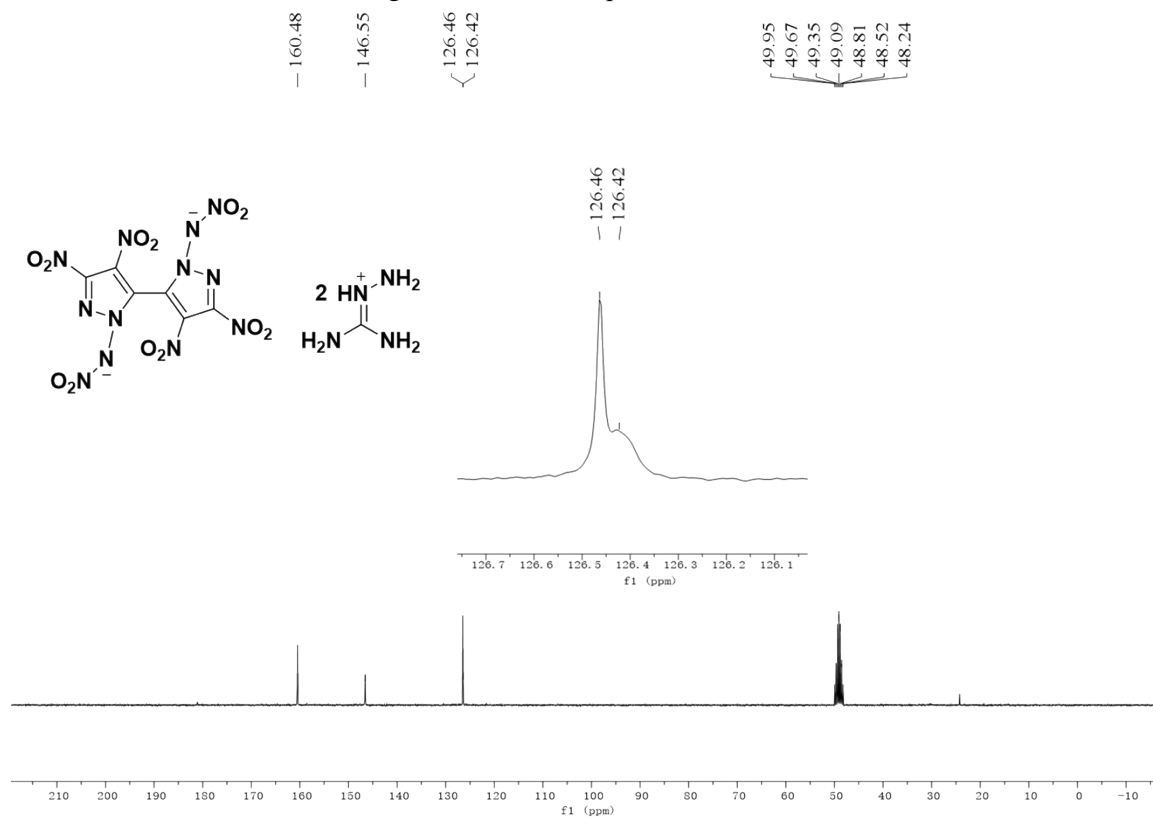

Figure S7.  $^{13}\text{C}$  NMR spectrum of **2b**

## 7. DSC plots

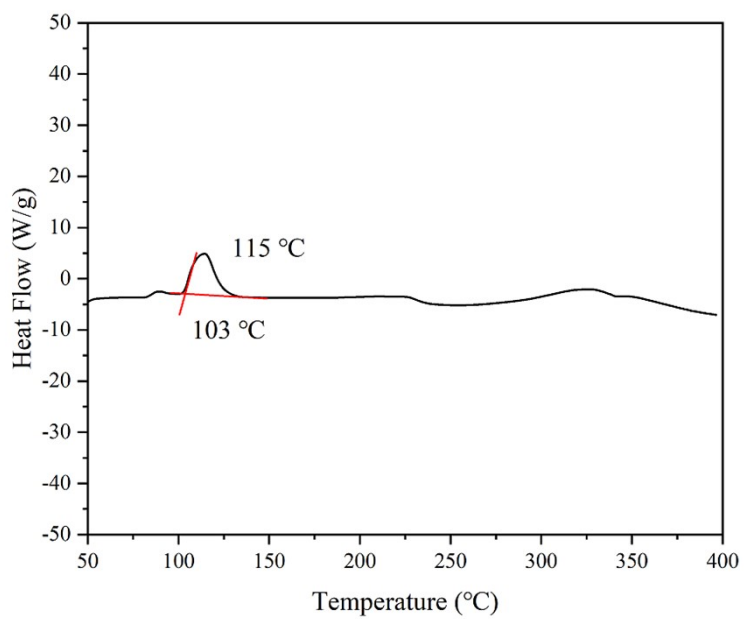

Figure S8. DSC plot of **2**

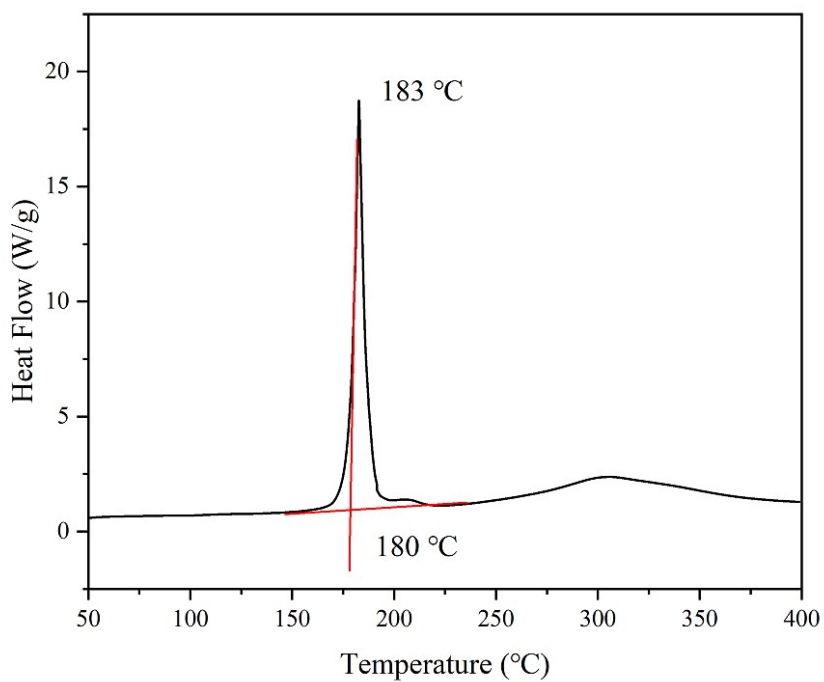

Figure S9. DSC plot of **2a**

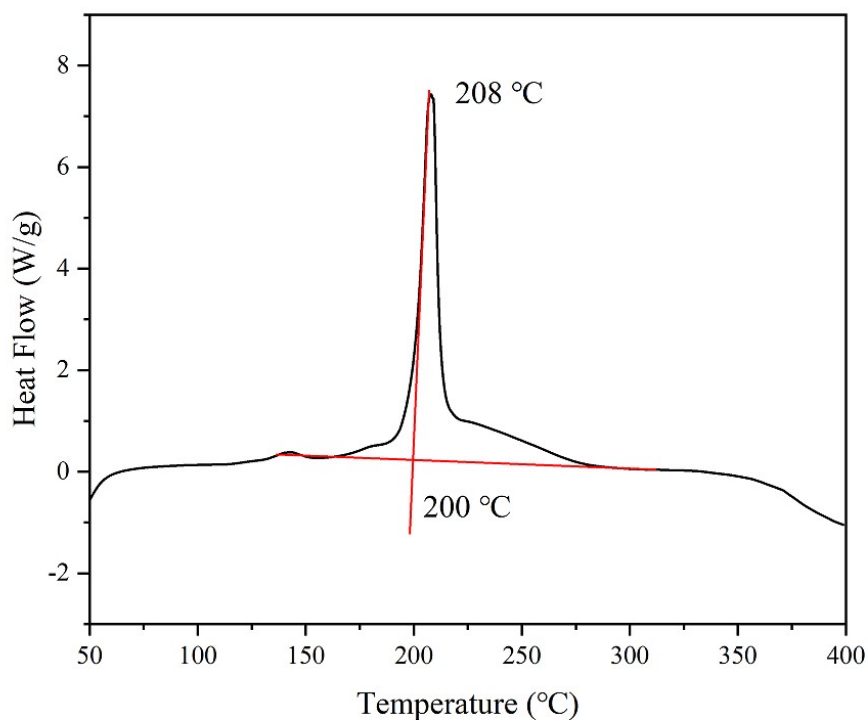

Figure S10. DSC plot of **2b**

## REFERENCES

- (1) Yin, P.; He, C.; Shreeve, J. M. Fully C/N-polynitro-functionalized 2,2'-biimidazole derivatives as nitrogen-and oxygen-rich energetic salts. *Chem. Eur. J.* **2016**, *22*(6), 2108–2113.
- (2) Yin, P.; Shreeve, J. M. From *N*-nitro to *N*-nitroamino: preparation of high-performance energetic materials by introducing nitrogen-containing ions. *Angew. Chem. Int. Ed.* **2015**, *54*(48), 14513–14517.
- (3) Cai, J.; Zhang, J.; Xiong, J.; Li, R.; Fei, T.; Lai, Q.; Yin, P.; Pang, S. The intramolecular integration of carbonyl and *N*-nitroamino groups to effectively balance the energy and sensitivity of *N*-nitroamino-functionalized bisazoles. *Chem. Eng. J.* **2023**, *467*, 143527.
- (4) Fischer, D.; Klapötke, T. M.; Stierstorfer, J.; Szimhardt, N. 1,1'-Nitramino-5,5'-bitetrazoles. *Chem. Eur. J.* **2016**, *22*(14), 4966–4970

- (5) Yin, P.; Zhang, J.; Mitchell, L. A.; Parrish, D. A.; Shreeve, J. M. 3,6-Dinitropyrazolo[4,3-*c*]pyrazole-based multipurpose energetic materials through versatile *N*-functionalization strategies. *Angew. Chem. Int. Ed.* **2016**, *55*(41), 12895–12897.
- (6) Li, W.; Tian, J.; Qi, X.; Wang, K.; Jin, Y.; Wang, B.; Zhang, Q. Synthesis of 4,8-dinitraminodifurazano[3,4-*b,e*]pyrazine derived nitrogen-rich salts as potential energetic materials. *ChemistrySelect* **2018**, *3*(2), 849–854.
- (7) Klapötke, T. M.; Leroux, M.; Schmid, P. C.; Stierstorfer, J.; Energetic materials based on 5,5'-diamino-4,4'-dinitramino-3,3'-bi-1,2,4-triazole. *Chem. Asian J.* **2015**, *11*(6), 844–851.
- (8) Lang, Q.; Sun, Q.; Wang, Q.; Lin, Q.; Lu, M. Embellishing bis-1,2,4-triazole with four nitroamino groups: advanced high-energy-density materials with remarkable performance and good stability. *J. Mater. Chem. A* **2020**, *8*(23), 11752–11760.
- (9) Yount, J.; Zeller, M.; Byrd, E. F. C.; Piercey, D. G. 4,4'-Dinitrimino-5,5'-diamino-3,3'-azo-bis-1,2,4-triazole: a high-performing zwitterionic energetic material. *Inorg. Chem.* **2021**, *60*(21), 16204–16212.
- (10) Yin, P.; Parrish, D. A.; Shreeve, J. M. Energetic multifunctionalized nitraminopyrazoles and their ionic derivatives: ternary hydrogen-bond induced high energy density materials. *J. Am. Chem. Soc.* **2015**, *137*(14), 4778–4786.
- (11) Fischer, D.; Klapötke, T. M.; Stierstorfer, J. 1,5-Di(nitramino)tetrazole: high sensitivity and superior explosive performance. *Angew. Chem. Int. Ed.* **2015**, *54*(35), 10299–10302.
- (12) Klapötke, T. M.; Martin, F. A.; Stierstorfer, J.; N-Bound primary nitramines based on 1,5-diaminotetrazole. *Chem. Eur. J.* **2012**, *18*(5), 1487–1501.
